# Supplementary material
Source: PubMed Central journal article supplement (PMC275580)
Supplement: nar_31_22_e143__1.pdf [file nar_31_22_e143__1.pdf]

## SUPPLEMENTARY MATERIAL (FIGURES)

### TBIO Method of Primer Design and PCR-Based Gene Synthesis

Figure 1S: Amino acid and DNA coding sequence of human protein kinase B-2 (PKB2). The synthetic DNA coding sequence for human PKB2 that was optimized for high-level protein expression in *E. coli* was generated by replacing the indicated amino acid codons.

```

          ctg                               cgtccgcgc       tta
1  atgaatgaggtgtctgtcatcaaagaaggctggctccacaagcgtggtgaatacatcaagacctggaggccacgggtacttctgtgaag  90
1  M N E V S V I K E G W L H K R G E Y I K T W R P R Y F L L K  30
          cgtcca                               ctgccg
91  agcgacggctccttcattgggtacaaggagggcccgaggcccctgatcagactctaccccccttaaacacttctccgtagcagaatgc  180
31  S D G S F I G Y K E R P E A P D Q T L P P L N N F S V A E C  60
          cgt  cgccct                               attcgt                               cgt
181  cagctgatgaagaccgagggccgcgaccacaacacctttgtcatacgtgcctgcagtgaccacagtcacgagaggaccttccacgtg  270
61  Q L M K T E R P R P N T F V I R C L Q W T T V I E R T F H V  90
          cgc                               cgt                               ctg                               cgc                               ccg
271  gattctccagacgagagggagtgatgcgggccatccagatggtcgccaacagcctcaagcagcgggccccaggcgaggacccccatg  360
91  D S P D E R E E W M R A I Q M V A N S L K Q R A P G E D P M  120
          cca                               gtt                               cgc
361  gactacaagtgtggctccccagtgactcctccacgactgaggagatggaagtggcgggtcagcaaggcacgggctaaagtgaccatgaat  450
121  D Y K C G S P S D S S T T E E M E V A V S K A R A K V T M N  150
          ctg  ttgctg                               ggc                               cgt
451  gacttcgactatctcaaactccttggcaagggaaacctttggcaaagtcatcctggtgcgggagaaggccactggccgctactacgccatg  540
151  D F D Y L K L L G K G T F G K V I L V R E K A T G R Y Y A M  180
          cgt                               attatc                               cgc  ctg                               cgt
541  aagatcctgcgaaaggaagtcatcattgccaaaggatgaagtcgctcacacagtcaccgagagccgggtcctccagaacaccaggcaccgg  630
181  K I L R K E V I I A K D E V A H T V T E S R V L Q N T R H P  210
          tta                               ttt
631  ttctcactgcgctgaagtatgccttccagaccacgaccgcctgtgctttgtgatggagtatgccaacgggggtgagctgttcttccac  720
211  F L T A L K Y A F Q T H D R L C F V M E Y A N G G E L F F H  240
          cgt  cgc                               cgtgcgcgc                               ctg                               cgt
721  ctgtcccgggagcgtgtcttcacagaggagcgggcccgggttttatggtgcagagattgtctcggctcttgagtacttgactcgcgaggac  810
241  L S R E R V F T E E R A R F Y G A E I V S A L E Y L H S R D  270
          gag  ctg                               ttg                               gaa
811  gtggtataaccgacatcaagctggaaaacctcatgctggacaaagatggccacatcaagatcactgactttggcctctgcaaagagggc  900
271  V V Y R D I K L E N L M L D K D G H I K I T D F G L C K E G  300
          acg                               gcc                               cgt
901  atcagtgacggggccaccatgaaaaccttctgtgggaccccggagtacctggcgcctgaggtgctggaggacaatgactatggccggggc  990
301  I S D G A T M K T F C G T P E Y L A P E V L E D N D Y G R A  330
          ccg                               ctg
991  gtggactggtgggggctgggtgtggtcatgtacgagatgatgtgcgccgcctgcccttctacaaccaggaccacgagcgcctcttcgag  1080
331  V D W W G L G V V M Y E M M C G R L P F Y N Q D H E R L F E  360
```

Figure 1S (continued)

|      |                                                                                                |     |        |     |     |     |        |     |     |      |
|------|------------------------------------------------------------------------------------------------|-----|--------|-----|-----|-----|--------|-----|-----|------|
|      | tta                                                                                            | ctg | gaggaa | ttt | tta | cca | ctg    | tta | ccg |      |
| 1081 | ctcatcctcatggaagagatccgcttcccgcgcacgctcagccccgaggccaagtccctgcttgctgggctgcttaagaaggaccccaag     |     |        |     |     |     |        |     |     | 1170 |
| 361  | L                                                                                              | I   | L      | M   | E   | E   | I      | R   | F   | P    |
|      |                                                                                                |     |        |     |     |     | R      | T   | L   | S    |
|      |                                                                                                |     |        |     |     |     | P      | E   | A   | K    |
|      |                                                                                                |     |        |     |     |     | S      | L   | L   | A    |
|      |                                                                                                |     |        |     |     |     | G      | L   | L   | K    |
|      |                                                                                                |     |        |     |     |     | K      | D   | P   | K    |
|      | 390                                                                                            |     |        |     |     |     |        |     |     |      |
|      | cggctg                                                                                         |     | cca    |     | cgt |     | ctg    |     |     |      |
| 1171 | cagaggcttgggtggggggcccagcgcgatgccaaggaggtcatggagcacaggttcttcctcagcatcaactggcaggacgtgggtccagaag |     |        |     |     |     |        |     |     | 1260 |
| 391  | Q                                                                                              | R   | L      | G   | G   | G   | P      | S   | D   | A    |
|      |                                                                                                |     |        |     |     |     | K      | E   | V   | M    |
|      |                                                                                                |     |        |     |     |     | E      | H   | R   | F    |
|      |                                                                                                |     |        |     |     |     | F      | L   | S   | I    |
|      |                                                                                                |     |        |     |     |     | N      | W   | Q   | D    |
|      |                                                                                                |     |        |     |     |     | V      | V   | Q   | K    |
|      | 420                                                                                            |     |        |     |     |     |        |     |     |      |
|      | tta                                                                                            |     | ccg    |     | cgc |     | gac    |     |     |      |
| 1261 | aagctcctgccacccttcaaacctcaggtcacgtccgaggtcgacacaaggtacttcgatgatgaatttaccgcccagtcctatcacaatc    |     |        |     |     |     |        |     |     | 1350 |
| 421  | K                                                                                              | L   | L      | P   | P   | F   | K      | P   | Q   | V    |
|      |                                                                                                |     |        |     |     |     | T      | S   | E   | V    |
|      |                                                                                                |     |        |     |     |     | D      | T   | R   | Y    |
|      |                                                                                                |     |        |     |     |     | F      | D   | D   | E    |
|      |                                                                                                |     |        |     |     |     | F      | T   | A   | Q    |
|      |                                                                                                |     |        |     |     |     | S      | I   | T   | I    |
|      | 450                                                                                            |     |        |     |     |     |        |     |     |      |
|      | cct                                                                                            |     | gat    |     | cgt |     | tttccg |     | gcg |      |
| 1351 | acacccccctgaccgctatgacagcctgggcttactggagctggaccagcggaccacttccccagttctcctactcggccagcatccgc      |     |        |     |     |     |        |     |     | 1440 |
| 451  | T                                                                                              | P   | P      | D   | R   | Y   | D      | S   | L   | G    |
|      |                                                                                                |     |        |     |     |     | L      | L   | E   | L    |
|      |                                                                                                |     |        |     |     |     | D      | Q   | R   | T    |
|      |                                                                                                |     |        |     |     |     | H      | F   | P   | Q    |
|      |                                                                                                |     |        |     |     |     | F      | S   | Y   | S    |
|      |                                                                                                |     |        |     |     |     | A      | S   | I   | R    |
|      | 480                                                                                            |     |        |     |     |     |        |     |     |      |
| 1441 | gagtga                                                                                         |     |        |     |     |     |        |     |     | 1443 |
| 481  | E                                                                                              |     |        |     |     |     |        |     |     | 481  |

Figure 2S: Amino acid and DNA coding sequence of human p70 40S ribosomal protein S6 kinase-1 (S6K1). The synthetic DNA coding sequence for human S6K1 that was optimized for high-level protein expression in *E. coli* was generated by replacing the indicated amino acid codons.

|     |                                                                                              |           |           |        |        |
|-----|----------------------------------------------------------------------------------------------|-----------|-----------|--------|--------|
|     | cgtcgccgctgccgt                                                                              | cgc       | cgt       | att    |        |
| 1   | atgaggcgacgaaggaggcgggacggccttttaccagccccggacttccgagacaggggaagctgaggacatggcaggagtgtttgacata  |           |           |        | 90     |
| 1   | M R R R R R R D G F Y P A P D F R D R E A E D M A G V F D I                                  |           |           |        | 30     |
|     |                                                                                              | ctgaacgag | gat       | ggc    |        |
| 91  | gacctggaccagccagaggacgcgggctctgaggatgagctggaggaggggggtcagttaaatgaaagcatggaccatgggggagttgga   |           |           |        | 180    |
| 31  | D L D Q P E D A G S E D E L E E G G Q L N E S M D H G G V G                                  |           |           |        | 60     |
|     | tac                                                                                          | cgc       | cgc       |        |        |
| 181 | ccatatgaacttggcatggaacattgtgagaaatgtgaaatctcagaaactagtgtgaacagagggccagaaaaaatcagaccagaatgt   |           |           |        | 270    |
| 61  | P Y E L G M E H C E K F E I S E T S V N R G P E K I R P E C                                  |           |           |        | 90     |
|     | ctg                                                                                          | gtg       | caggtgcgc | atcttc |        |
| 271 | tttgagctacttcgggtacttggtaaagggggctatggaaaggtttttcaagtacgaaaagtaacaggagcaaatactgggaaaatattt   |           |           |        | 360    |
| 91  | F E L L R V L G K G G Y G K V F Q V R K V T G A N T G K I F                                  |           |           |        | 120    |
|     | attgtgcaac                                                                                   |           |           |        |        |
| 361 | gccatgaaggtgcttaaaaaggcaatgatagtaagaaatgctaaagatacagctcatacaaaaagcagaacggaatattctggaggaagta  |           |           |        | 450    |
| 121 | A M K V L K K A M I V R N A K D T A H T K A E R N I L E E V                                  |           |           |        | 150    |
|     | ccg                                                                                          | ctgatctac | ctg       | ctg    |        |
| 451 | aagcatcccttcatcgtggatttaattatgcctttcagactgggtggaaaactctacctcatccttgagtatctcagtgaggagaacta    |           |           |        | 540    |
| 151 | K H P F I V D L I Y A F Q T G G K L Y L I L E Y L S G G E L                                  |           |           |        | 180    |
|     | ctggagcgt                                                                                    | att       | ttc       | ctggcc | agc    |
| 541 | tttatgcagttagaaagagaggaatatttatggaagacactgcctgcttttacttggcagaaatctccatggctttggggcatttacat    |           |           |        | 630    |
| 181 | F M Q L E R E G I F M E D T A C F Y L A E I S M A L G H L H                                  |           |           |        | 210    |
|     | cag                                                                                          | cgc       | ctgaac    | ctg    | ggcctg |
| 631 | caaaaggggatcatctacagagacctgaagccggagaatatcatgcttaatcaccaaggtcatgtgaaactaacagactttggactatgc   |           |           |        | 720    |
| 211 | Q K G I I Y R D L K P E N I M L N H Q G H V K L T D F G L C                                  |           |           |        | 240    |
|     | acc                                                                                          | att       | cgc       |        |        |
| 721 | aaagaatctattcatgatggaacagtcacacacacattttgtggaacaatagaatacatggcccctgaaatcttgatgagaagtggccac   |           |           |        | 810    |
| 241 | K E S I H D G T V T H T F C G T I E Y M A P E I L M R S G H                                  |           |           |        | 270    |
|     | ctg                                                                                          | ccg       | cgcaaaaag |        |        |
| 811 | aatcgtgctgtggatttgggtggagtttgggagcattaatgtatgacatgctgactggagcacccttactgaggagaatagaaagaaa     |           |           |        | 900    |
| 271 | N R A V D W W S L G A L M Y D M L T G A P P F T G E N R K K                                  |           |           |        | 300    |
|     | aag                                                                                          | ctgaagtgc | ccg       | cgt    | cgc    |
| 901 | acaattgacaaaatcctcaaagttaaactcaatttgcctccctacctcacacaagaagccagagatctgcttaaaaagctgctgaaaaga   |           |           |        | 990    |
| 301 | T I D K I L K C K L N L P P Y L T Q E A R D L L K K L L K R                                  |           |           |        | 330    |
|     |                                                                                              | cgc       |           |        |        |
| 991 | aatgctgcttctcgtctgggagctggctcctggggacgctggagaagttcaagctcatccattcttttagacacattaactgggaagaactt |           |           |        | 1080   |
| 331 | N A A S R L G A G P G D A G E V Q A H P F F R H I N W E E L                                  |           |           |        | 360    |

Figure 2S (continued)

|      |                                                                                            |            |     |        |            |     |      |
|------|--------------------------------------------------------------------------------------------|------------|-----|--------|------------|-----|------|
|      | cgc                                                                                        | ccaccg     |     | gaggaa |            | cgc |      |
| 1081 | ctggctcgaaaggtggagccccctttaaacctctggtgcaatctgaagaggatgtaagtcagtttgattccaagtttacacgtcagaca  |            |     |        |            |     | 1170 |
| 361  | L A R K V E P P F K P L L Q S E E D V S Q F D S K F T R Q T                                |            |     |        |            |     | 390  |
|      | gatagt                                                                                     |            |     |        | tac        |     |      |
| 1171 | cctgtcgacagcccagatgactcaactctcagtgaaagtgccaatcaggtctttctgggttttacatatgtggctccatctgtacttgaa |            |     |        |            |     | 1260 |
| 391  | P V D S P D D S T L S E S A N Q V F L G F T Y V A P S V L E                                |            |     |        |            |     | 420  |
|      |                                                                                            | ttc ttcgag | cgc | cgtcgc | cg         |     |      |
| 1261 | agtgtgaaagaaaagttttcctttgaaccaaaaatccgatcacctcgaagatttattggcagcccacgaacacctgtcagcccagtcaaa |            |     |        |            |     | 1350 |
| 421  | S V K E K F S F E P K I R S P R R F I G S P R T P V S P V K                                |            |     |        |            |     | 450  |
|      | agc                                                                                        | cg         | gca |        |            |     |      |
| 1351 | ttttctcctggggatttctggggaagaggtgcttcggccagcacagcaaattcctcagacacctgtggaataccaatggaaacaagtggc |            |     |        |            |     | 1440 |
| 451  | F S P G D F W G R G A S A S T A N P Q T P V E Y P M E T S G                                |            |     |        |            |     | 480  |
|      | att                                                                                        |            |     | attcgc | aagaag gcc |     |      |
| 1441 | atagagcagatggatgtgacaatgagtggggaagcatcggcaccacttccaatacgacagccgaactctgggccatacaaaaaacaagct |            |     |        |            |     | 1530 |
| 481  | I E Q M D V T M S G E A S A P L P I R Q P N S G P Y K K Q A                                |            |     |        |            |     | 510  |
|      | ccg                                                                                        |            | ctg |        |            |     |      |
| 1531 | tttcccatgatctccaaacggccagagcacctgcgtatgaatctatga                                           |            |     |        |            |     | 1578 |
| 511  | F P M I S K R P E H L R M N L                                                              |            |     |        |            |     | 526  |

Figure 3S: Amino acid and DNA coding sequence of human phosphoinositide-dependent kinase-1 (PDK1). The synthetic DNA coding sequence for human PDK1 that was optimized for high-level protein expression in *E. coli* was generated by replacing the indicated amino acid codons.

|     |                                                                                             |        |     |           |     |     |     |         |     |      |
|-----|---------------------------------------------------------------------------------------------|--------|-----|-----------|-----|-----|-----|---------|-----|------|
|     | cgt                                                                                         |        | ccg | agctccggt |     | ccg |     | cgt     |     |      |
| 1   | atggccaggaccaccagccagctgtatgacgccgtgcccatccagtcagcgtgggtgttatgttcctgcccatccccatcaatggtgagg  |        |     |           |     |     |     |         | 90  |      |
| 1   | M A R T T S Q L Y D A V P I Q S S V V L C S C P S P S M V R                                 |        |     |           |     |     |     |         | 30  |      |
|     |                                                                                             | agctcc | ccg |           | cgt | ccg |     | cgccccg |     |      |
| 91  | accagactgagtccagcagccccctggcattcctgggtggcagcaggcagggccccgccatggacggcactgcagccgagcctcggccc   |        |     |           |     |     |     |         | 180 |      |
| 31  | T Q T E S S T P P G I P G G S R Q G P A M D G T A A E P R P                                 |        |     |           |     |     |     |         | 60  |      |
|     |                                                                                             |        | cca |           | aaa | cgc |     | ttt     | ggt | ggt  |
| 181 | ggcgccggctccctgcagcatgccagcctccgcccagcctcggaagaagcggcctgaggacttcaagtttgggaaaatccttggggaa    |        |     |           |     |     |     |         |     | 270  |
| 61  | G A G S L Q H A Q P P P Q P R K K R P E D F K F G K I L G E                                 |        |     |           |     |     |     |         |     | 90   |
|     |                                                                                             |        | cgt |           | cgt |     | atc |         | cgt | att  |
| 271 | ggctctttttccacggttgtcctggctcgagaactggcaacctccagagaatatgcgattaaaattctggagaagcgacatatcataaaa  |        |     |           |     |     |     |         |     | 360  |
| 91  | G S F S T V V L A R E L A T S R E Y A I K I L E K R H I I K                                 |        |     |           |     |     |     |         |     | 120  |
|     | gaa                                                                                         | ccg    | cgt |           | ccg |     |     |         |     |      |
| 361 | gagaacaaggtcccctatgtaaccagagagcgggatgtcatgtcgcgcctggatcacccttctttgttaagctttacttcacatttcag   |        |     |           |     |     |     |         |     | 450  |
| 121 | E N K V P Y V T R E R D V M S R L D H P F F V K L Y F T F Q                                 |        |     |           |     |     |     |         |     | 150  |
|     |                                                                                             |        | ggt | ctg       |     |     |     |         |     |      |
| 451 | gacgacgagaagctgtatttcggccttagttatgccaaaaatggagaactacttaaatatattcgcaaaatcggttcattcgatgagacc  |        |     |           |     |     |     |         |     | 540  |
| 151 | D D E K L Y F G L S Y A K N G E L L K Y I R K I G S F D E T                                 |        |     |           |     |     |     |         |     | 180  |
|     |                                                                                             | cgt    |     |           |     | cgt |     |         |     |      |
| 541 | tgtaccgcattttacacggctgagatcgtgtctgcttttagagtacttgcacggcaagggcatcattcacaggaccttaaacggaaaac   |        |     |           |     |     |     |         |     | 630  |
| 181 | C T R F Y T A E I V S A L E Y L H G K G I I H R D L K P E N                                 |        |     |           |     |     |     |         |     | 210  |
|     |                                                                                             |        | att |           | ggt |     |     | cgt     |     |      |
| 631 | attttgtaaataagatatgcacatccagatcacagattttggaacagcaaaagtcttatccccagagagcaacaagccagggccaac     |        |     |           |     |     |     |         |     | 720  |
| 211 | I L L N E D M H I Q I T D F G T A K V L S P E S K Q A R A N                                 |        |     |           |     |     |     |         |     | 240  |
|     |                                                                                             | ggt    |     |           |     |     |     | ggt     |     |      |
| 721 | tcattcgtgggaacagcgcagtacgtttctccagagctgctcacggagaagtccgcctgtaagagttcagacctttgggctcttggtatgc |        |     |           |     |     |     |         |     | 810  |
| 241 | S F V G T A Q Y V S P E L L T E K S A C K S S D L W A L G C                                 |        |     |           |     |     |     |         |     | 270  |
|     | attatt                                                                                      |        | ggt | cct       | cgt | ggt |     | att     |     |      |
| 811 | ataatataccagcttgtggcaggactcccaccattccgagctggaaacgagtatcttatatttcagaagatcattaagttggaatatgac  |        |     |           |     |     |     |         |     | 900  |
| 271 | I I Y Q L V A G L P P F R A G N E Y L I F Q K I I K L E Y D                                 |        |     |           |     |     |     |         |     | 300  |
|     |                                                                                             | tttttt | cgt |           | cgc |     |     |         |     |      |
| 901 | ttccagaaaaattcttccctaaggcaagagacctcgtggagaaacttttggtttttagatgccacaaagcggttaggctgtgaggaaatg  |        |     |           |     |     |     |         |     | 990  |
| 301 | F P E K F F P K A R D L V E K L L V L D A T K R L G C E E M                                 |        |     |           |     |     |     |         |     | 330  |
|     |                                                                                             | ggt    | ggt |           | ttt |     | caa |         |     |      |
| 991 | gaaggatacggacctcttaaagcacaccggttcttcgagtcggtcacgtgggagaaacctgcaccagcagacgcctccgaagctcaccgct |        |     |           |     |     |     |         |     | 1080 |
| 331 | E G Y G P L K A H P F F E S V T W E N L H Q Q T P P K L T A                                 |        |     |           |     |     |     |         |     | 360  |

Figure 3S (continued)

|      |                                                                                             |                                                                           |      |
|------|---------------------------------------------------------------------------------------------|---------------------------------------------------------------------------|------|
|      |                                                                                             | gat                                                                       |      |
| 1081 | tacctgccggctatgtc                                                                           | ggaagacgacgaggactgctatggcaattatgacaatctcctgagccagtttggctgcatgcaggtgtcttcg | 1170 |
| 361  | Y L P A M S E D D E D C Y G N Y D N L L S Q F G C M Q V S S                                 |                                                                           | 390  |
|      | agc                                                                                         | ccg cgt                                                                   | atc  |
| 1171 | tcctcctcctcacactccctgtcagcctccgacacgggcctgccccagaggtcaggcagcaacatagagcagtacattcacgatctggac  |                                                                           | 1260 |
| 391  | S S S S H S L S A S D T G L P Q R S G S N I E Q Y I H D L D                                 | cgtctg ctg                                                                | 420  |
|      |                                                                                             | ggt                                                                       |      |
| 1261 | tcgaactcctttgaactggacttacagttttccgaagatgagaagaggttggttggtggagaagcaggctggcggaaacccttggcaccag |                                                                           | 1350 |
| 421  | S N S F E L D L Q F S E D E K R L L L E K Q A G G N P W H Q                                 |                                                                           | 450  |
|      | aac attgtg                                                                                  | cgtcgc                                                                    |      |
| 1351 | tttgtagaaaataatttaataactaaagatgggcccagtgataagcgggaagggtttatttgcaagacgacgacagctggtgctcacagaa |                                                                           | 1440 |
| 451  | F V E N N L I L K M G P V D K R K G L F A R R R Q L L L T E                                 |                                                                           | 480  |
|      | ggt tac gac                                                                                 | cgt                                                                       |      |
| 1441 | ggaccacatttatattatgtggatcctgtcaacaaagttctgaaaggtgaaattccttggtcacaagaacttcgaccagaggccaagaat  |                                                                           | 1530 |
| 481  | G P H L Y Y V D P V N K V L K G E I P W S Q E L R P E A K N                                 | cgt tac                                                                   | 510  |
|      |                                                                                             | ccg ggt                                                                   | cgt  |
| 1531 | tttaaaactttctttgtccacacgcctaacaggacgtattatctgatggaccccagcgggaacgcacacaagtgggtgcaggaagatccag |                                                                           | 1620 |
| 511  | F K T F F V H T P N R T Y Y L M D P S G N A H K W C R K I Q                                 |                                                                           | 540  |
|      | cgtcaacgt                                                                                   |                                                                           |      |
| 1621 | gaggtttggaggcagcgataaccagagccacccggacgccgctgtgcagtga                                        |                                                                           | 1668 |
| 541  | E V W R Q R Y Q S H P D A A V Q                                                             |                                                                           | 556  |

## **SUPPLEMENTARY MATERIAL (TABLES)**

Tables 1S-3S: Oligonucleotide primers designed for the thermodynamically-balanced conventional (TBC) (11,12) and thermodynamically-balanced inside-out (TBIO) methods of PCR-based synthesis of the codon-optimized PKB2 (Table 1S), S6K1 (Table 2S), and PDK1 (Table 3S) gene sequences. In each table, the coding- or "sense"-strand oligonucleotide primers (5'→3') and the noncoding- or "antisense"-strand oligonucleotide primers (3'←5') designed for both the TBC and TBIO strategies are listed for (A) the amino-terminal half and (B) the carboxy-terminal half of the gene sequence. For each primer, the overall length (nt), the coding region of the gene sequence, the melting temperature,  $T_m$ , and the number of base pairs (bp) for each overlapping region are given. For each primer, the 5'-terminal overlapping nucleotides are indicated in blue color, and the 3'-terminal nucleotides are indicated in red color. Green colored regions of primers indicate nucleotides that are common to both the 5'- and 3'-overlapping regions. The start and stop codons are capitalized in the primer sequences.

Table 1AS: Oligonucleotide primers designed for the thermodynamically-balanced conventional (TBC) (11,12) and thermodynamically-balanced inside-out (TBIO) methods of PCR-based synthesis of the amino-terminal half of the codon-optimized protein kinase B-2 (PKB2) gene sequence.

| TBC name | coding or "sense" (S) oligonucleotide primers (5'→3')<br>noncoding or "antisense" (A) primers (3'←5') | $T_m$ (°C) | overlap (bp) | length (nt) | coding region | TBIO name |
|----------|-------------------------------------------------------------------------------------------------------|------------|--------------|-------------|---------------|-----------|
| C-S01    | ggggggggcatATGaatgaggtgtctgtcatcaaagaaggctggctgcacaagcgtggt                                           | 64.8       | 19           | 60          | -12-48        | IO-S19    |
| C-A01    | gaccgacgtgttcgcaccacttatgtagttctggaccgcaggcgcgatgaagaatgactt                                          | 63.4       | 22           | 60          | 29-89         | IO-S18rc  |
| C-A01rc  | ctggctgcacaagcgtggtgaatacatcaagacctggcgtccgcgctacttcttactgaa                                          |            |              |             |               | IO-S18    |
| C-S02    | gtccgcgctacttcttactgaagagcgcagcggctccttcattgggtacaaggagcgtccag                                        | 65.2       | 22           | 60          | 68-127        | IO-S17    |
| C-A02    | taaccatgttcctcgcaggtctccggggactagtctgagacggcgggaatttgttgaag                                           | 65.4       | 24           | 60          | 106-165       | IO-S16rc  |
| C-A02rc  | attgggtacaaggagcgtccagaggcccctgatcagactctgcccccttaaacaacttc                                           |            |              |             |               | IO-S16    |
| C-S03    | actctgccgcccttaaacaacttcctcgtagcagaatgacagctgatgaagaccgagcgt                                          | 65.3       | 21           | 60          | 142-201       | IO-S15    |
| C-A03    | gtcgactacttctggctcgcaggcgcgggattgtggaaacagtaagcaacggacgtcacc                                          | 65.3       | 21           | 60          | 181-240       | IO-S14rc  |
| C-A03rc  | cagctgatgaagaccgagcgtccgcgccctaacaccttctgctattcgttgccctgcagtgg                                        |            |              |             |               | IO-S14    |
| C-S04    | gtcattcgttgccctgcagtggaaccacagtcatcgagcgtaccttccacgtggattctcca                                        | 63.4       | 22           | 60          | 220-279       | IO-S13    |
| C-A04    | atggaaggtgcacctaaagaggtctgctcgcgctcctcacctacgcacggtaggtctacca                                         | 65.3       | 21           | 60          | 258-317       | IO-S12rc  |
| C-A04rc  | taccttccacgtggattctccagacgagcgcgaggagtgatgctgctgccatccagatggt                                         |            |              |             |               | IO-S12    |
| C-S05    | gatgctgcccacccagcgcgcccagggcagggaccgatggacta                                                          | 64.8       | 19           | 69          | 297-365       | IO-S11    |
| C-A05    | cgctcctgggctacctgatgttcacaccgagggggttcaactgaggaggtgc                                                  | 64.8       | 19           | 50          | 347-396       | IO-S10rc  |
| C-A05rc  | gcgaggaccgcgatggactacaagtgtggctccccaagtgactcctccacg                                                   |            |              |             |               | IO-S10    |
| C-S06    | cccaagtgactcctccacgactgaggagatggaagttgctggtcagcaaggcagcgcgctaa                                        | 64.5       | 20           | 60          | 378-437       | IO-S09    |
| C-A06    | cagtcggtcctcgtgctgctgatttcaactggtacttactgaagctgatagactttaacgacccg                                     | 64.8       | 26           | 60          | 418-477       | IO-S08rc  |
| C-A06rc  | gtcagcaaggcagcgcgctaaagtgaccatgaatgacttcgactatctgaaattgctgggc                                         |            |              |             |               | IO-S08    |
| C-S07    | acttcgactatctgaaattgctgggcaagggcaccttggcaagtcatcctggtgctg                                             | 65.3       | 21           | 60          | 452-511       | IO-S07    |
| C-A07    | cgtttcagtaggaccacgcactcttccgggtgaccggcgatgatgctggtacttctaggacg                                        | 63.4       | 22           | 60          | 491-550       | IO-S06rc  |
| C-A07rc  | gcaaagtcatcctggtgctgctgagaaggccactggccgctactacgccatgaagatcctgc                                        |            |              |             |               | IO-S06    |
| C-S08    | tactacgccatgaagatcctgctgtaaggaagtcattatgcccaaggatgaagtcgctcac                                         | 65.3       | 21           | 60          | 529-588       | IO-S05    |
| C-A08    | cggttctacttccagcagtggtgtcagtggtctctcggcgcaggacgtcttgtgggcagtg                                         | 64.8       | 19           | 60          | 568-627       | IO-S04rc  |
| C-A08rc  | gccaaggatgaagtcgctcacacagtcaccgagagccgcgctcctgcagaacacccgtcac                                         |            |              |             |               | IO-S04    |
| C-S09    | cctgcagaacaccgctcacccgttcttaactgcgctgaagtatgcctttcagaccacga                                           | 63.5       | 23           | 60          | 609-668       | IO-S03    |
| C-A09    | ttcatacggaaagtctgggtgctggcggacacgaaacactacctatacgggtgccccca                                           | 64.5       | 20           | 60          | 646-705       | IO-S02rc  |
| C-A09rc  | aagtatgcctttcagaccacgaccgcctgtgcttctgtgatggagtatgcccaacgggggt                                         |            |              |             |               | IO-S02    |
| C-S10    | tggagtatgcccaacgggggtgagctgttcttccacctgtccgctgagcgcgctcttcacag                                        | 64.8       | 19           | 60          | 686-745       | IO-S01    |



Table 1BS: Oligonucleotide primers designed for the thermodynamically-balanced conventional (TBC) (11,12) and thermodynamically-balanced inside-out (TBIO) methods of PCR-based synthesis of the carboxy-terminal half of the codon-optimized protein kinase B-2 (PKB2) gene sequence.

| TBC name | coding region | length (nt) | overlap (bp) | $T_m$ (°C) | coding or "sense" (S) oligonucleotide primers (5'→3') | noncoding or "antisense" (A) primers (3'←5')  | TBIO name |
|----------|---------------|-------------|--------------|------------|-------------------------------------------------------|-----------------------------------------------|-----------|
| C-A10    | 727-786       | 60          | 19           | 64.8       | gcactcgcgcagagaagtgtc                                 | tcctcgcacgcgcgaaataccacgtctctaacagagccga      | IO-A01    |
| C-S11    |               |             |              |            | tttatgggtgcagagattgtctcggct                           | ctggagtacttgcactcgcgtgacgtgggtataacc          | IO-A02rc  |
| C-S11rc  | 761-820       | 60          | 26           | 64.8       | aaataccacgtctctaacagagccga                            | gacctcatgaacgtgagcgcactgcaccatatgg            | IO-A02    |
| C-A11    | 801-860       | 60          | 20           | 64.5       | gagcgcactgcaccatatgg                                  | cgctgtagtctcgacctcttggactacgacctgtttctacc     | IO-A03    |
| C-S12    |               |             |              |            | acctgatgctggacaaaagatgg                               | ccacatcaaatgcactgacttttggcttgtgcaaagaag       | IO-04rc   |
| C-S12rc  | 839-898       | 60          | 22           | 63.4       | tggactacgacctgtttctacc                                | gggtgtagtcttagtgactgaaaccgaacacgtttcttc       | IO-A04    |
| C-A12    | 875-934       | 60          | 24           | 63.7       | gactgaaaccgaacacgtttcttc                              | cgtagtcaactgccccgggtggtacttttggagacac         | IO-A05    |
| C-S13    |               |             |              |            | ggccaccatgaaaaccttctgtg                               | ggacgcggagtagcctggccctctgaggtgctggagga        | IO-A06rc  |
| C-S13rc  | 912-971       | 60          | 23           | 65.3       | ccgggtggtacttttggagacac                               | cctcgcggcctcatggaccgggactccacgacctcct         | IO-A06    |
| C-A13    | 954-1013      | 60          | 18           | 65.3       | gggactccacgacctcct                                    | gttactgataccggcacggcaccctgaccacccccgaccaca    | IO-A07    |
| C-S14    |               |             |              |            | actggtgggggctgggtgt                                   | gggtcatgtacagatgatgtgctgcccgcctgcccgttctaca   | IO-A08rc  |
| C-S14rc  | 995-1054      | 60          | 19           | 66.9       | tgaccacccccgaccaca                                    | ccagtacatgctctactacacgcggcggacggcaagatgt      | IO-A08    |
| C-A14    | 1037-1096     | 60          | 18           | 65.2       | cgccggacggcaagatgt                                    | tggctcctggtgctcgcggacaagatcaattaggactacctcc   | IO-A09    |
| C-S15    |               |             |              |            | ctgttctagttaatcctgatggagg                             | aaatccgctttccgcgcacgttaagcccagaggcc           | IO-A10rc  |
| C-S15rc  | 1072-1131     | 60          | 25           | 64.6       | gacaagatcaattaggactacctcc                             | tttaggcgaaaggcgcgtgcaattcgggtctccgg           | IO-A10    |
| C-A15    | 1113-1172     | 60          | 19           | 64.8       | gtgcaattcgggtctccgg                                   | ttcagggacgaccgaccccgacaatttcttctcctgggettctgt | IO-A11    |
| C-S16    |               |             |              |            | ctgttaaagaaggacccgaagca                               | gcgcctgggtggggggccaagcgtgccaaggagggtc         | IO-A12rc  |
| C-S16rc  | 1150-1209     | 60          | 23           | 63.5       | gacaatttcttctcctgggettctgt                            | cgccgacccacccccggttcgtctacggttctcctccag       | IO-A12    |
| C-A16    | 1190-1249     | 60          | 20           | 64.5       | gttcgctacggttctcctccag                                | tacctcgtggcaagaaggactcctcgtagttgacctcctgc     | IO-A13    |
| C-S17    |               |             |              |            | gagcatcaactggcaggacgt                                 | tggtccagaagaagtactgccaccggttcaaacctcaggt      | IO-A14rc  |
| C-S17rc  | 1230-1289     | 60          | 20           | 64.5       | ctcgtagttgacctcctgc                                   | accaggctcttcttcaatgacgggtggcaagtttggagtcca    | IO-A14    |
| C-A17    | 1269-1328     | 60          | 21           | 65.3       | cggtggcaagtttggagtcca                                 | gtgcaggctccagctgtgtgctgatgaagctgctacttaa      | IO-A15    |
| C-S18    |               |             |              |            | gacacacgctacttcgacgatgaatt                            | taccgcccagtcctacacaaatcacacctcctgac           | IO-A16rc  |
| C-S18rc  | 1303-1362     | 60          | 26           | 64.8       | ctgtgtgctgatgaagctgctacttaa                           | atggcgggtcaggtagtgttagtgtggaggactg            | IO-A16    |
| C-A18    | 1341-1400     | 60          | 22           | 63.4       | gtagtgttagtgtggaggactg                                | gcgatactatcggacccgaatgacctcgacctggctgc        | IO-A17    |
| C-S19    |               |             |              |            | ttactggagctggaccagcgt                                 | taccacactttccgcagttctcttactcggcgagcatccgc     | IO-A18rc  |
| C-S19rc  | 1381-1440     | 60          | 20           | 64.5       | aatgacctcgacctggctgc                                  | atgggtgaaaggcgtcaagaggatgagccgctcgtagggc      | IO-A18    |
| C-A19    | 1423-1482     | 60          | 18           | 65.2       | atgagccgctcgtaggcg                                    | ctcACTattactgagctcctaggccgcgactcgcgcgcgcgc    | IO-A19    |

Table 2AS: Oligonucleotide primers designed for the thermodynamically-balanced conventional (TBC) (11,12) and thermodynamically-balanced inside-out (TBIO) methods of PCR-based synthesis of the amino-terminal half of the codon-optimized p70 40S ribosomal protein S6 kinase-1 (S6K1) gene sequence.

| TBC name | coding or "sense" (S) oligonucleotide primers (5'→3')<br>noncoding or "antisense" (A) primers (3'←5') | $T_m$ (°C) | overlap (bp) | length (nt) | coding region | TBIO name |
|----------|-------------------------------------------------------------------------------------------------------|------------|--------------|-------------|---------------|-----------|
| C-S01    | gaaggtcgtcatATGcgtcgccgtcgccgtcgggacggcttttaccagccccggacttc                                           | 64.5       | 20           | 60          | -12-48        | IO-S22    |
| C-A01    | aatgggtcggggcctgaagggcgtggcacttcgactcctgtaccgtcctcaciaactgt                                           | 63.4       | 22           | 60          | 29-88         | IO-S21rc  |
| C-A01rc  | tttaccagccccggacttcgcgaccgtgaagctgaggacatggcaggagtgtttgaca                                            |            |              |             |               | IO-S21    |
| C-S02    | gacatggcaggagtgtttgacattgacctggaccagccagaggacgcgggctctgaggat<br>gagctggag                             | 64.5       | 20           | 69          | 67-135        | IO-S20    |
| C-A02    | cgagactcctactcgacctcctccccagtcgacttgctctcgtacctagtacc                                                 | 63.4       | 21           | 55          | 116-170       | IO-S19rc  |
| C-A02rc  | gctctgaggatgagctggaggaggggggtcagctgaacgagagcatggatcatgg                                               |            |              |             |               | IO-S19    |
| C-S03    | gaacgagagcatggatcatggcggagtggaccatacgaacttggtatggaacattgtga                                           | 63.6       | 27           | 60          | 150-209       | IO-S18    |
| C-A03    | tatgcttgaaccgtaccttgaactcctttaaacttttagagtctttgatcacacttggc                                           | 63.2       | 26           | 60          | 183-242       | IO-S17rc  |
| C-A03rc  | atacgaacttggcatggaacattgtgagaaatttgaatctcagaaactagtgtgaaccg                                           |            |              |             |               | IO-S17    |
| C-S04    | gaaatctcagaaactagtgtgaaccgcgggccagaaaaatccgccagaatgttttgag                                            | 63.6       | 27           | 60          | 217-276       | IO-S16    |
| C-A04    | cttttttagggcgggtcttataaaaactcgacgaagcccatgaaccatttccccgatacct                                         | 63.3       | 21           | 60          | 250-309       | IO-S15rc  |
| C-A04rc  | gaaaaaatccgccagaatgttttgagctgcttcgggtaacttggtaaagggggctatgga                                          |            |              |             |               | IO-S15    |
| C-S05    | cttggtaaagggggctatggaagggtgtttcaggctgcgcaaagtaacaggagcaaatact                                         | 63.2       | 26           | 60          | 289-348       | IO-S14    |
| C-A05    | acgcgtttcattgtcctcgtttatgacccttttagaagcggctacttccacgaatttttcc                                         | 63.5       | 23           | 60          | 323-382       | IO-S13rc  |
| C-A05rc  | tgcgcaaagtaacaggagcaaatactgggaaaatcctcgccatgaaggtgcttaaaaagg                                          |            |              |             |               | IO-S13    |
| C-S06    | cgccatgaaggtgcttaaaaaggcaatgattgtgcgcaacgctaaagatacagctcatac                                          | 64.8       | 26           | 60          | 360-419       | IO-S12    |
| C-A06    | gcggttgcgattttctatgtcaggtatgttttcgtcttgcttataagacctccttcatttc                                         | 63.6       | 27           | 60          | 394-453       | IO-S11rc  |
| C-A06rc  | cgcaacgctaaagatacagctcatacaaaagcagaacggaatattctggaggaagtaaaag                                         |            |              |             |               | IO-S11    |
| C-S07    | gaacggaatattctggaggaagtaaacatccgttcatcgtggatctgatctacgccttt                                           | 63.5       | 23           | 60          | 427-486       | IO-S10    |
| C-A07    | agcacctagactagatgcggaaggtctgaccaccttttgagatggagttaggacctcatag                                         | 63.5       | 23           | 60          | 464-523       | IO-S09rc  |
| C-A07rc  | tcgtggatctgatctacgcctttcagactggtggaaaactctacctcatcctggagtatc                                          |            |              |             |               | IO-S09    |
| C-S08    | actctacctcatcctggagtatctcagtgaggagaaactgtttatgcagctggagcgtga                                          | 63.4       | 22           | 60          | 501-560       | IO-S08    |
| C-A08    | acaaatacgtcgacctcgacctccttataaaaataccttctgtgacggacgaagatggacc                                         | 64.5       | 20           | 60          | 539-598       | IO-S07rc  |
| C-A08rc  | tgtttatgcagctggagcgtgagggaaatttttatggaagaactgctgctgcttctacctgg                                        |            |              |             |               | IO-S07    |
| C-S09    | caactgctgcttctacctggccgaaatcagcatggctttggggcattttacatcagaaggg                                         | 63.5       | 23           | 60          | 579-638       | IO-S06    |
| C-A09    | aaccccgtaaatgtagtcttcccctagtagatggcgtggacttcggcctcttatagtac                                           | 63.4       | 22           | 60          | 616-675       | IO-S05rc  |
| C-A09rc  | ttggggcattttacatcagaaggggatcatctaccgcaactgaagccggagaatatcatg                                          |            |              |             |               | IO-S05    |
| C-S10    | cctgaagccggagaatatcatgctgaaccaccaaggtcatgtgaaactgacagactttgg                                          | 64.8       | 26           | 60          | 654-713       | IO-S04    |
| C-A10    | ccagtacactttgactgtctgaaaccggacacgcttcttagataagtaactacctgtcag                                          | 63.5       | 29           | 60          | 688-747       | IO-S03rc  |
| C-A10rc  | ggtcatgtgaaactgacagactttggcctgtgcaagaatctattcatgatggaacagtc                                           |            |              |             |               | IO-S03    |
| C-S11    | gcaaagaatctattcatgatggaacagtcacacacaccttttggtggaacaattgaataca                                         | 63.9       | 30           | 60          | 719-778       | IO-S02    |
| C-A11    | gtgtgtggaaaacaccttgttaacttatgtaccggggactttagaactacgcgtcaccgg                                          | 63.4       | 21           | 60          | 749-808       | IO-S01rc  |
| C-A11rc  | cacacaccttttggtggaacaattgaatacatggcccctgaaatcttgatgcgccagtgccc                                        |            |              |             |               | IO-S01    |

Table 2BS: Oligonucleotide primers designed for the thermodynamically-balanced conventional (TBC) (11,12) and thermodynamically-balanced inside-out (TBIO) methods of PCR-based synthesis of the carboxy-terminal half of the p70 40S ribosomal protein S6 kinase-1 (S6K1) gene sequence.

| TBC name | coding region | length (nt) | overlap (bp) | $T_m$ (°C) | coding or "sense" (S) oligonucleotide primers (5'→3') | noncoding or "antisense" (A) primers (3'←5') | TBIO name |
|----------|---------------|-------------|--------------|------------|-------------------------------------------------------|----------------------------------------------|-----------|
| C-S12    | 788-847       | 60          | 21           | 63.4       | aaatcttgatg                                           | gattggtggagtctgggagcattaa                    | IO-A01rc  |
| C-S12rc  |               |             |              |            | tttagaactacgcgtcaccggtg                               | gttagcacgacacctaaccacctcagaccctcgtaatt       | IO-A01    |
| C-A12    | 822-882       | 60          | 25           | 64.6       | ctaaccacctcagaccctcgtaatt                             | acatactgtacgactgacctcgtggcggtgaagtga         | IO-A02    |
| C-S13    | 863-922       | 60          | 20           | 64.5       | ctggagcaccgccattcactggggaga                           | atcgcaaaaagacaattgacaagatcctgaagt            | IO-A03rc  |
| C-S13rc  |               |             |              |            | gacctcgtggcggtgaagtga                                 | cccctcttagcgtttttctgttaactgttctaggacttca     | IO-A03    |
| C-A13    | 890-949       | 60          | 33           | 64.8       | tagcgtttttctgttaactgttctaggacttca                     | cgtttgagttaaacggagggcatggagt                 | IO-A04    |
| C-S14    | 924-983       | 60          | 26           | 64.8       | caaactcaatttgcctccgtacctca                            | cacaagaagcccgatctgcttaaaaagctgct             | IO-A05rc  |
| C-S14rc  |               |             |              |            | gtttgagttaaacggagggcatggagt                           | gtgttcttcgggcactagacgaatttttcgacga           | IO-A05    |
| C-A14    | 956-1018      | 60          | 25           | 64.6       | gggcactagacgaatttttcgacga                             | ctttgcttacgacgaagagcagaccctcgaccag           | IO-A06    |
| C-S15    | 999-1058      | 60          | 20           | 64.5       | ttctcgtctgggagctggctc                                 | ctggggacgctggaagttaacagctcatccattctttcg      | IO-A07rc  |
| C-S15rc  |               |             |              |            | aagagcagaccctcgaccag                                  | gaccctgacgacctcttcaagttcgagttaggtaagaaagc    | IO-A07    |
| C-A15    | 1032-1091     | 60          | 27           | 63.6       | tcttcaagttcgagttaggtaagaaagc                          | gggtgaattgaccttcttgaagaccgagcgtt             | IO-A08    |
| C-S16    | 1071-1130     | 60          | 21           | 63.4       | ggaagaacttctggctcgcaagg                               | gtggagccaccgtttaaacctctgttgcaatctgagga       | IO-A09rc  |
| C-S16rc  |               |             |              |            | ccttcttgaagaccgagcgtt                                 | ccacctcgggtggcaaatgggagacaacgtagactcct       | IO-A09    |
| C-A16    | 1104-1163     | 60          | 27           | 63.6       | caaatgggagacaacgtagactcct                             | tctacattcagtcaaaactaagggttcaaatgtgc          | IO-A10    |
| C-S17    | 1135-1194     | 60          | 29           | 63.5       | gtaagtcagtttgattccaagtttacag                          | ccagacacctgtcgatagttccagatgactca             | IO-A11rc  |
| C-S17rc  |               |             |              |            | cattcagtcaaaactaagggttcaaatgtgc                       | ggctcgtggacagctatcaggtctactgagt              | IO-A11    |
| C-A17    | 1172-1231     | 60          | 23           | 63.5       | gacagctatcaggtctactgagt                               | tgagagtcactttcaggttagtccagaaaagacccaa        | IO-A12    |
| C-S18    | 1210-1269     | 60          | 22           | 63.4       | gccaatcaggtctttctgggtt                                | ttacatacgtggctccatctgtacttgaaagtgtgaaa       | IO-A13rc  |
| C-S18rc  |               |             |              |            | cggttagtccagaaaagacccaa                               | aatgtatgcaccgaggttagacatgaactttcacacttt      | IO-A13    |
| C-A18    | 1243-1302     | 60          | 27           | 63.6       | cgaggtagacatgaactttcacacttt                           | cttttcaagaggagagctcgggttttagggcaggt          | IO-A14    |
| C-S19    | 1281-1340     | 60          | 22           | 63.4       | cttcgagccaaaaatccgctca                                | cctcgtcgtttatttggcagcccacgtacacctgtcag       | IO-A15rc  |
| C-S19rc  |               |             |              |            | gaagctcgggttttagggcaggt                               | ggagcagcgaataaccgtcgggtgcatgtggacagtc        | IO-A15    |
| C-A19    | 1321-1380     | 60          | 20           | 64.5       | tcgggtgcatgtggacagtc                                  | gggtcagtttaaatcgggaccctaaagaccctgcgcca       | IO-A16    |
| C-S20    | 1362-1421     | 60          | 19           | 64.8       | ggatttctggggacgcggt                                   | gcttcggcaagcacaagcaaatcctcagacacctgtggaata   | IO-A17rc  |
| C-S20rc  |               |             |              |            | cctaaagaccctgcgcca                                    | cgaagccgttcgtgctggttaggagctctgtggacaccttat   | IO-A17    |
| C-A20    | 1396-1455     | 60          | 26           | 64.8       | cgtttaggagctctgtggacaccttat                           | gggttacctttgttcaccgtaactcgtctacctta          | IO-A18    |
| C-S21    | 1433-1492     | 60          | 23           | 63.5       | caagtggcattgagcagatggat                               | gtgacaatgagtggggaagcatcggcaccacttccaa        | IO-A19rc  |
| C-S21rc  |               |             |              |            | gttcaccgtaactcgtctacctta                              | cactgttactcacccttcgtagccgtggtaaggtt          | IO-A19    |
| C-A21    | 1472-1531     | 60          | 21           | 63.4       | ttcgtagccgtggtagaggtt                                 | aagcggtcggcttgagaccgggtatgttcttcgttcgga      | IO-A20    |
| C-S22    | 1511-1570     | 60          | 21           | 63.4       | ggccatacaagaagcaagcct                                 | ttccgatgatctccaaacgcccagagcaccctgcgtatga     | IO-A21rc  |
| C-S22rc  |               |             |              |            | cgggtatgttcttcgttcgga                                 | aaggctactagaggtttgcccgtctcgtggacgcatact      | IO-A21    |
| C-A22    | 1551-1610     | 60          | 20           | 64.5       | cggctcgtggacgcatact                                   | tagacACTattatcccagcagcgtggcgactcgttattg      | IO-A22    |

Table 3AS: Oligonucleotide primers designed for the thermodynamically-balanced conventional (TBC) (11,12) and thermodynamically-balanced inside-out (TBIO) methods of PCR-based synthesis of the amino-terminal half of the codon-optimized phosphoinositide-dependent protein kinase-1 (PKD1) gene sequence.

| TBC name | coding or "sense" (S) oligonucleotide primers (5'→3') | noncoding or "antisense" (A) primers (3'←5')  | T <sub>m</sub> (°C) | overlap (bp) | length (nt) | coding region | TBIO name |
|----------|-------------------------------------------------------|-----------------------------------------------|---------------------|--------------|-------------|---------------|-----------|
| C-S01    | actgactcatATGgcccgtaccaccagccagctgtatgacgccgtg        |                                               | 66.5                | 20           | 46          | -10-36        | IO-S24    |
| C-A01    | cggtcgacatactgcgccacggctaggtctcgaggcaaca              | caatacaaggacgggcaggg                          | 64.5                | 20           | 60          | 17-76         | IO-S23rc  |
| C-A01rc  | gccagctgtatgacgccgtg                                  | ccgatccagagctccgttgtgttatgttcctgcccgtccc      | 68.6                | 20           | 60          | 57-116        | IO-S23    |
| C-S02    | gttatgttcctgcccgtccc                                  | catcaatgggtgctgaccagactgagagctccacgccc        | 68.6                | 20           | 60          | 57-116        | IO-S22    |
| C-A02    | tgactctcgaggtgcccgggaccgtaaggaccaccgtcggcagt          | cccgggcccgtacctg                              | 67.2                | 16           | 60          | 97-156        | IO-S21rc  |
| C-A02rc  | actgagagctccacgcccgtg                                 | ggcattcctgggtggcagccgtcagggcccggccatggac      | 67.2                | 17           | 60          | 141-200       | IO-S21    |
| C-S03    | gggcccggccatggac                                      | ggcactgcagccgagcctcgcccgggcgcccgtccctgcagca   | 67.2                | 17           | 60          | 141-200       | IO-S20    |
| C-A03    | gggcccgggacgtcgt                                      | acgggtcggaggcgggtgctcggagcgttttttcgcccgtacctg | 63.6                | 26           | 60          | 184-243       | IO-S19rc  |
| C-A03rc  | gccgggtccctgcagcat                                    | gccagcctccgccacagcctcgcaaaaagcgcctgaggac      | 63.6                | 27           | 60          | 218-277       | IO-S19    |
| C-S04    | agcctcgcaaaaagcgcctgaggac                             | tttaagtgttggtaaaatccttgggtgaaggctctt          | 63.6                | 27           | 60          | 218-277       | IO-S18    |
| C-A04    | aaccatttttaggaaccacttccgagaaa                         | aaagggtgccaacaggaccgagcacttgaccgtt            | 65.3                | 21           | 60          | 251-310       | IO-S17rc  |
| C-A04rc  | ttggtaaaaatccttgggtgaaggctctt                         | tttccacgggtgtcctggctcgtgaactggcaa             | 64.8                | 26           | 60          | 290-349       | IO-S17    |
| C-S05    | tcctgggtcgtgaactggcaac                                | cctcccgtgaataatgcatcaaaaattctggagaagcgtc      | 64.8                | 26           | 60          | 290-349       | IO-S16    |
| C-A05    | acgctagtttttaagacctcttcgag                            | tatagtaatttctttgttcagggcatacattg              | 64.0                | 32           | 60          | 324-383       | IO-S15rc  |
| C-A05rc  | tgcatcaaaaattctggagaagcgtc                            | atcatttaagaaaacaagggtcccgtatgtaac             | 66.5                | 20           | 60          | 352-411       | IO-S15    |
| C-S06    | atcatttaagaaaacaagggtcccgtatgtaac                     | ccgtgagcgcgatgtcatgtcgcgcctg                  | 66.5                | 20           | 60          | 352-411       | IO-S14    |
| C-A06    | cgctacagtagcagcgcggac                                 | ctagtgggcaagaaa                               | 65.3                | 25           | 60          | 392-451       | IO-S13rc  |
| C-A06rc  | gcgatgtcatgtcgcgcctg                                  | gatcaccggttctttgttaagctttacttcacatttcagg      | 65.3                | 25           | 60          | 392-451       | IO-S13    |
| C-S07    | gttaagctttacttcacatttcagg                             | acgacgagaagctgtatttcggccttagttatgcc           | 63.7                | 24           | 60          | 427-486       | IO-S12    |
| C-A07    | gacataaagccggaatcaatacgggtttttaccactgacgaat           | ttatataagcgttttag                             | 63.3                | 36           | 60          | 463-522       | IO-S11rc  |
| C-A07rc  | ctgtatttcggccttagttatgccc                             | aaaaatgggtgaactgcttaaatatattcgcaaaatc         | 65.4                | 24           | 60          | 487-546       | IO-S11    |
| C-S08    | aaaaatgggtgaactgcttaaatatattcgcaaaatc                 | gggttcattcgatgagacctgtacc                     | 65.4                | 24           | 60          | 523-582       | IO-S10    |
| C-A08    | ccaagtaagctactctggacatggg                             | caaaaatgtgcccgactctagcacagacgaaatctc          | 65.4                | 24           | 60          | 523-582       | IO-S09rc  |
| C-A08rc  | gggttcattcgatgagacctgtacc                             | cgtttttacacggctgagatcgtgtctgcttttagag         | 65.4                | 24           | 60          | 559-618       | IO-S09    |
| C-S09    | gctgagatcgtgtctgcttttagagt                            | acttgcacggcaagggcatcattcaccgtgacctt           | 65.4                | 24           | 60          | 559-618       | IO-S08    |
| C-A09    | ttcccgtagtaagtgccactggaa                              | ttggccttttgtaaaacaatttacttctatacgtg           | 63.8                | 35           | 60          | 595-654       | IO-S07rc  |
| C-A09rc  | aagggcatcattcaccgtgacctta                             | aacccggaaaacattttgttaaatgaagatatgcac          | 64.0                | 28           | 60          | 620-679       | IO-S07    |
| C-S10    | aaccggaaaacattttgttaaatgaagatatg                      | cacattcagatcacagatttttggtacag                 | 64.0                | 28           | 60          | 620-679       | IO-S06    |
| C-A10    | gtgtaagtctagtgctaaaaccatgtc                           | ggttttcagaataggggtctctcgtttgttcgg             | 65.3                | 27           | 60          | 652-711       | IO-S05rc  |
| C-A10rc  | cacattcagatcacagatttttggtacag                         | caaaaagctttatcccagagagcaacaagcc               | 65.3                | 21           | 60          | 685-744       | IO-S05    |
| C-S11    | gtcttatcccagagagcaaaacagcc                            | cgtgccaaactcattcgtgggtacagcgcagtac            | 65.3                | 21           | 60          | 685-744       | IO-S04    |
| C-A11    | aagcaccatgtcgcgtcatg                                  | caaagaggtctcgacgagtgccctctcagggcagcattc       | 65.3                | 21           | 60          | 724-783       | IO-S03rc  |
| C-A11rc  | ttcgtgggtacagcgcagtac                                 | gtttctccagagctgctcaccggagaagtcgcgctgtgtaag    | 63.0                | 26           | 60          | 763-822       | IO-S03    |
| C-S12    | acggagaagtcgcctgtaag                                  | agttcagacctttgggctcttgggtgcattatttaccag       | 63.0                | 26           | 60          | 763-822       | IO-S02    |
| C-A12    | cccgagaaccaacgtaataaatggtc                            | gaacaccgtccagaggggtggaaagccagccat             | 64.5                | 20           | 60          | 797-856       | IO-S01rc  |
| C-A12rc  | gggctcttgggtgcattatttaccag                            | cttgggtggcaggtctcccaccttccgtgctggtgta         |                     |              |             |               | IO-S01    |

Table 3BS: Oligonucleotide primers designed for the thermodynamically-balanced conventional (TBC) (11,12) and thermodynamically-balanced inside-out (TBIO) methods of PCR-based synthesis of the carboxy-terminal half of the codon-optimized phosphoinositide-dependent protein kinase-1 (PDK1) gene sequence.

| TBC name | coding region | length (nt) | overlap (bp) | $T_m$ (°C) | coding or "sense" (S) oligonucleotide primers (5'→3')<br>noncoding or "antisense" (A) primers (3'←5') | TBIO name |
|----------|---------------|-------------|--------------|------------|-------------------------------------------------------------------------------------------------------|-----------|
| C-S13    | 837–896       | 60          | 20           | 64.5       | cccacctttccgtgctggtaacgagtatccttatttttcagaagatcattaagttggaata                                         | IO-A01rc  |
| C-S13rc  |               |             |              |            | gggtggaaaggcagcaccattgctcatagaataaaaaagtcttctagtaattcaaccttat                                         | IO-A01    |
| C-A13    | 859–918       | 60          | 38           | 62.7       | ctcatagaataaaaaagtcttctaataattcaaccttataactgaaaggtccttttaagaag                                        | IO-A02    |
| C-S14    | 882–941       | 60          | 37           | 64.1       | cattaagttggaatatgactttccagaaaaattcttccttaaggcacgtgacctcgtgga                                          | IO-A03rc  |
| C-S14rc  |               |             |              |            | gtaattcaaccttataactgaaaggtccttttaagaagggattccgtgactggagcacct                                          | IO-A03    |
| C-A14    | 922–981       | 60          | 20           | 64.5       | ttccgtgactggagcacctccttgaaaaccaaactctacgggtgttccggaatccgaca                                           | IO-A04    |
| C-S15    | 960–1019      | 60          | 22           | 65.3       | tgccacaaagcgttaggctgtgaggaaatggaaggttacggctcctcttaagcacacccc                                          | IO-A05rc  |
| C-S15rc  |               |             |              |            | acgggtgttccggaatccgacactcctttaccttccaatggcaggagaatttcgtgtggg                                          | IO-A05    |
| C-A15    | 998–1057      | 60          | 22           | 65.3       | tgccaggagaatttcgtgtgggcaagaaactcaggcagtgcaacctcttggacgtggctg                                          | IO-A06    |
| C-S16    | 1040–1099     | 60          | 18           | 65.2       | gggagaacctgcaccagcaaacgcctccgaagctcaccgcttacctgcccggctatgtcgg                                         | IO-A07rc  |
| C-S16rc  |               |             |              |            | ccctcttggacgtgtgcttctgagggcttcgagtgccgaaatggacggccgatacagcc                                           | IO-A07    |
| C-A16    | 1082–1141     | 60          | 18           | 65.2       | tgacggccgatacagccttctgctactcctgacgataccgttaatactgttagaggact                                           | IO-A08    |
| C-S17    | 1113–1172     | 60          | 29           | 64.9       | ctgctatggcaattatgacaatctcctgaagcagtttggctgtatgcaggtgtcttcgag                                          | IO-A09rc  |
| C-S17rc  |               |             |              |            | gacgataccgttaataactgttagaggactcggtaaacacgacatacgtccacagaagctc                                         | IO-A09    |
| C-A17    | 1152–1211     | 60          | 21           | 63.4       | gacatacgtccacagaagctcgaggaggagtgtagggacagtcggaggctgtgcccgga                                           | IO-A10    |
| C-S18    | 1196–1255     | 60          | 16           | 64.7       | cctccgacacgggctgccgcagcgttcaggcagcaacatcagcagcagcattcacgac                                            | IO-A11rc  |
| C-S18rc  |               |             |              |            | ggaggctgtgcccggacggcgtcgcaagtcctgctgttagctcgtcatgtaagtgttag                                           | IO-A11    |
| C-A18    | 1233–1292     | 60          | 23           | 63.5       | gtagctcgtcatgtaagtgtcagacctgagcttgaggaaacttgacctgaatgtcaaaag                                          | IO-A12    |
| C-S19    | 1266–1325     | 60          | 27           | 63.6       | ctcctttgaaactggactttacagttttccgaagatgagaagcgtcgttggctggagaagca                                        | IO-A13rc  |
| C-S19rc  |               |             |              |            | gaggaaacttgacctgaatgtcaaaagccttctactcttcgagacaacgacctcttcgt                                           | IO-A13    |
| C-A19    | 1304–1363     | 60          | 22           | 65.3       | tcgagacaacgacctcttcgctccgaccgcattgggaacctgtgtcaaacatcttttat                                           | IO-A14    |
| C-S20    | 1334–1393     | 60          | 30           | 65.3       | gtaacccttggcaccagttttagaaaaataacttaattctgaagatgggcccagtgata                                           | IO-A15rc  |
| C-S20rc  |               |             |              |            | cattgggaacctgtgtcaaacatcttttatgtaattaaacttctaccgggtcacctat                                            | IO-A15    |
| C-A20    | 1372–1431     | 60          | 22           | 65.3       | gacttctaccgggtcacctatctcgttcccaaataaacgtgcagcggctgtcgacaac                                            | IO-A16    |
| C-S21    | 1413–1472     | 60          | 19           | 64.8       | acgtcgcgacagctgtgtctcacagaaggtccacatttataattacgtggacctgtcaa                                           | IO-A17rc  |
| C-S21rc  |               |             |              |            | tgacggcgtgtcgacaacgagtgcttccaggtgtaaatataatgcacctgggacagtt                                            | IO-A17    |
| C-A21    | 1445–1504     | 60          | 28           | 64.0       | gtgtaaatataatgcacctgggacagttgtttcaaactttccactttaaggaaccagtg                                           | IO-A18    |
| C-S22    | 1480–1539     | 60          | 25           | 62.9       | ctgaaaggtgaaattccttggcacaagaactctgctccagaggccaagaattttaaaact                                          | IO-A19rc  |
| C-S22rc  |               |             |              |            | gactttccactttaaggaaccagtggttcttgaagcaggtctccggttcttaaaattttga                                         | IO-A19    |
| C-A22    | 1512–1571     | 60          | 28           | 64.0       | agcaggtctccggttcttaaaaattttgaagaacaggtgtgcggattggcatgcatgat                                           | IO-A20    |
| C-S23    | 1551–1610     | 60          | 21           | 63.3       | cacgcctaaccgtactactatctgtagccggcaggtaacgcacacaagtggtgccc                                              | IO-A21rc  |
| C-S23rc  |               |             |              |            | gtgcccattggcatgcatgatagactacctggcctcgcattgctgtgttccaccaggg                                            | IO-A21    |
| C-A23    | 1592–1651     | 60          | 19           | 64.8       | tgctgtgttccaccagggcattctagctcctcaaaccgcagttgcaatggctcgggtgg                                           | IO-A22    |
| C-S24    | 1631–1690     | 60          | 21           | 65.3       | gtcaacgttaccagagccaccggagcggctgtgcagTAAtgatagctcagggatccgc                                            | IO-A23rc  |
| C-S24rc  |               |             |              |            | cagttgcaatggctcgggtggcctgcccgcacacgtcATTactatcgagctcctagggc                                           | IO-A23    |
| C-A24    | 1673–1702     | 60          | 18           | 63.0       | ctatcgagctcctagggcagtcgaatttat                                                                        | IO-A24    |
